# Supplementary material
Source: MDPI journal article supplement (https://www.mdpi.com/2071-1050/16/1/457)
Supplement: s1 [file s1 › sustainability-2790103-supplementary.pdf]

Table S1. The standards and methods used for the chemical analysis of sludge

| Number of analysis method according to Table 1 | Standard/ Methods                                                                                                                                                                                                                                                                                                        |
|------------------------------------------------|--------------------------------------------------------------------------------------------------------------------------------------------------------------------------------------------------------------------------------------------------------------------------------------------------------------------------|
| (1)                                            | SR EN ISO 10523:2012 Water quality. Determination of pH. The standard describes a method for determining the pH value also for water in liquid sludge, in the range from pH 2 to pH 12.                                                                                                                                  |
| (2)                                            | SR EN 27888:1997 Water quality. Determination of electrical conductivity. The standard establishes a method of measuring electrical conductivity for all types of water.                                                                                                                                                 |
| (3)                                            | SR EN ISO 11885:2009. Water quality. Determination of selected elements by inductively coupled plasma optical emission spectroscopy (ICP-OES).                                                                                                                                                                           |
| (4)                                            | EPA Method 7473:2007 (SW-846): Mercury in Solids and Solutions by Thermal Decomposition, Amalgamation, and Atomic Absorption Spectrophotometry, , SR EN 16192:2012 European Standard that specifies methods for the determination of some parameters in aqueous eluates for the characterization of waste, including Hg. |
| (5)                                            | ASTM D3859-08 Standard Test Methods For Selenium In Water, based on Atomic Absorption Spectroscopy (AAS).                                                                                                                                                                                                                |
| (6)                                            | EN 12457-2:2003. Waste characterization. Leaching. SR EN 12457-4:2003. Characterization of waste - Leaching - Compliance test for leaching of granular waste materials and sludges.                                                                                                                                      |
| (7)                                            | SR EN ISO 10304-1:2009. Water quality. Determination of dissolved anions by liquid chromatography of ions.                                                                                                                                                                                                               |
| (8)                                            | SR EN 15216:2008. Characterization of waste - Determination of total dissolved solids (TDS) in water and eluates.                                                                                                                                                                                                        |
| (9)                                            | MSZ EN 1484:1998. Water analysis - guidelines for the determination of total organic carbon (toc) and dissolved organic carbon (doc).                                                                                                                                                                                    |
